# Supplementary material
Source: MDPI journal article supplement (https://www.mdpi.com/2073-4344/13/9/1312)
Supplement: s1 [file s1 › catalysts-2619231-supplementary.pdf]

# Enhanced Solar Light-Driven Photocatalytic Degradation of Tetracycline Using Fe<sup>3+</sup>-Doped CdO/ZnS Nanocomposite: Mechanistic Insights and Performance Evaluation

R. Joyce Stella <sup>1,†</sup>, I. Sreevani <sup>1</sup>, Thirumala Rao Gurugubelli <sup>2,†</sup>, R.V.S.S.N. Ravikumar <sup>3,\*</sup>, Ravindranadh Koutavarapu <sup>4,\*</sup>

<sup>1</sup> Department of Humanities and Science, KSRR College of Engineering, Kadapa 516003, Andhra Pradesh, India; joycestella10@gmail.com (R.J.S.); srivani.kadapa@gmail.com (I.S.)

<sup>2</sup> Department of Physics, School of Sciences, SR University, Warangal 506371, Telangana, India; g.thirumalao@sru.edu.in

<sup>3</sup> Department of Physics, Acharya Nagarjuna University, Guntur 522 510, Andhra Pradesh, India

<sup>4</sup> Department of Robotics Engineering, College of Mechanical and IT Engineering, Yeungnam University, Gyeongsan 38541, Republic of Korea

\* Correspondence: rvssn@yahoo.co.in (R.V.S.S.N. Ravikumar); ravindra\_physicist@ynu.ac.kr (R. Koutavarapu)

† These authors contributed equally to this work.

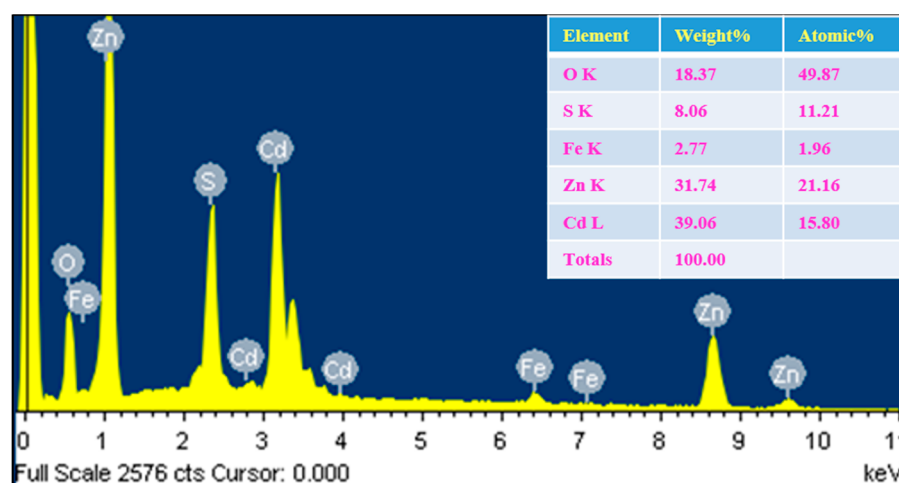

**Figure S1** Compositional analysis of the Fe<sup>3+</sup>-doped CdO/ZnS nanocomposite.

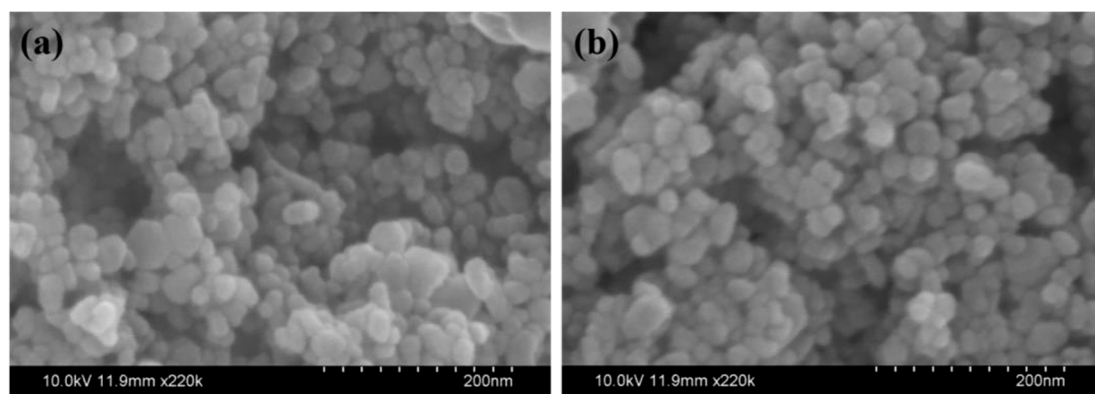

**Figure S2** SEM images of  $\text{Fe}^{3+}$ -doped CdO/ZnS nanocomposite (a) before and (b) after stability test.

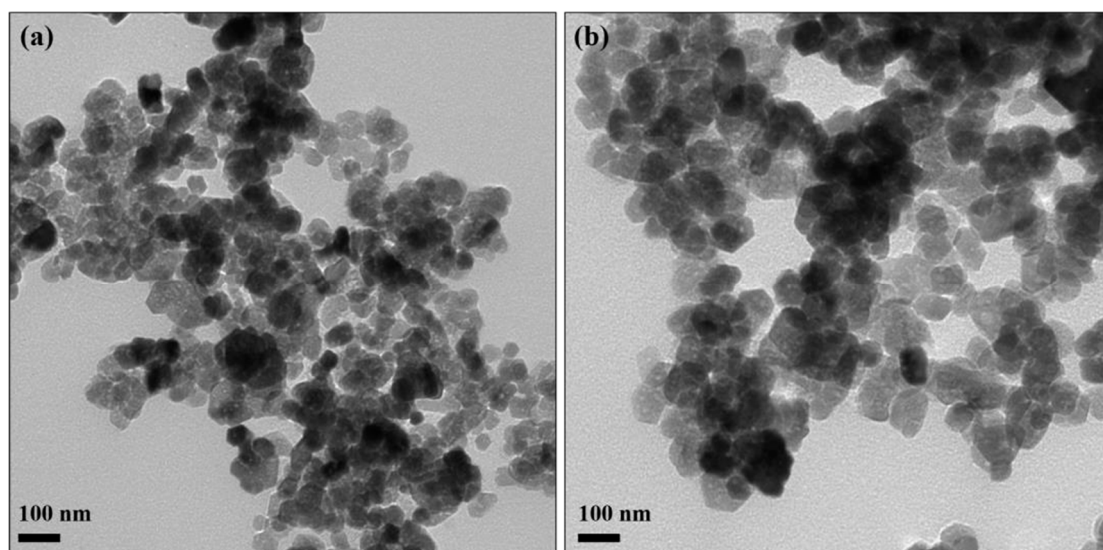

**Figure S3** TEM images of  $\text{Fe}^{3+}$ -doped CdO/ZnS nanocomposite (a) before and (b) after stability test.
